# Supplementary material
Source: PubMed Central journal article supplement (PMC4822467)
Supplement: rspb20160106supp1.pdf [file rspb20160106supp1.pdf]

## ESM 1

Basidiomycota taxa identified with ITS1F and ITS4b-21, by sample type. Numbers indicate the number of trees or swabs in which each taxon was found. Sample sizes are listed for each sample type.

<sup>WD</sup> Indicates putative wood decay taxa

\* Indicates data that were originally reported in [14].

| GenBank accession number | Taxon                                        | Closest identified taxon with GenBank BLAST (accession number) | % Base pair match | % Query coverage | Inaccessible drilled starts (n = 30) | Accessible drilled starts (n = 30) | RCW swabs (n = 11) | Complete RCW cavities* (n = 36) | RCW cavity starts* (n = 42) | Non-excavated trees* (n = 60) | Total detections |
|--------------------------|----------------------------------------------|----------------------------------------------------------------|-------------------|------------------|--------------------------------------|------------------------------------|--------------------|---------------------------------|-----------------------------|-------------------------------|------------------|
| KM103937                 | <i>Acaromyces ingoldii</i>                   | <i>Acaromyces ingoldii</i> (NR_073342.1)                       | 100 %             | 100 %            | 15                                   | 4                                  | 0                  | 8                               | 3                           | 0                             | 30               |
| KM103938                 | <i>Acaromyces</i> sp. 1                      | <i>Acaromyces ingoldii</i> (NR_073342.1)                       | 98 %              | 100 %            | 8                                    | 8                                  | 0                  | 10                              | 0                           | 0                             | 26               |
| KM104040                 | <i>Porodaedalea pini</i> SE <sup>WD</sup>    | <i>Porodaedalea</i> sp. (JX110039.1)                           | 100 %             | 100 %            | 0                                    | 2                                  | 1                  | 8                               | 13                          | 2                             | 26               |
| KM104130                 | Exobasidiomycetes sp. 2                      | Exobasidiomycetidae sp. (DQ682574.1)                           | 100 %             | 96 %             | 0                                    | 1                                  | 5                  | 13                              | 2                           | 0                             | 21               |
| KM103972                 | <i>Cryptococcus</i> sp. 1                    | <i>Cryptococcus pinus</i> (NR_111269.1)                        | 99 %              | 94 %             | 3                                    | 8                                  | 0                  | 0                               | 0                           | 0                             | 11               |
| KM103971                 | <i>Cryptococcus neoformans</i>               | <i>Cryptococcus neoformans</i> (KC254022.1)                    | 100 %             | 100 %            | 0                                    | 0                                  | 10                 | 0                               | 0                           | 0                             | 10               |
| KM103967                 | <i>Coniophora</i> sp. 1 <sup>WD</sup>        | <i>Coniophora prasinoidea</i> (GU187519.1)                     | 91 %              | 100 %            | 0                                    | 0                                  | 7                  | 2                               | 0                           | 0                             | 9                |
| KM104041                 | <i>Postia sericeomollis</i> <sup>WD</sup>    | <i>Postia sericeomollis</i> (KC585367.1)                       | 98 %              | 100 %            | 0                                    | 0                                  | 6                  | 2                               | 0                           | 0                             | 8                |
| KM103976                 | <i>Daedaleopsis confragosa</i> <sup>WD</sup> | <i>Daedaleopsis confragosa</i> (KC176348.1)                    | 99 %              | 100 %            | 0                                    | 0                                  | 7                  | 0                               | 0                           | 0                             | 7                |
| KM104071                 | <i>Trametes versicolor</i> <sup>WD</sup>     | <i>Trametes versicolor</i> (KC176344.1)                        | 99 %              | 100 %            | 2                                    | 3                                  | 1                  | 1                               | 0                           | 0                             | 7                |
| KM104143                 | Unidentified Basidiomycete 7                 | <i>Bullera formosana</i> (AB118873.1)                          | 88 %              | 70 %             | 1                                    | 1                                  | 0                  | 4                               | 1                           | 0                             | 7                |

|          |                                                |                                                  |       |       |   |   |   |   |   |   |   |
|----------|------------------------------------------------|--------------------------------------------------|-------|-------|---|---|---|---|---|---|---|
| KM103987 | <i>Exidia</i> sp. 1 <sup>WD</sup>              | <i>Exidia</i> sp.<br>(DQ241774.1)                | 100 % | 90 %  | 1 | 2 | 2 | 0 | 0 | 0 | 5 |
| KM104023 | <i>Peniophora cinerea</i> <sup>WD</sup>        | <i>Peniophora cinerea</i><br>(GU062269.1)        | 99 %  | 98 %  | 2 | 0 | 1 | 1 | 0 | 1 | 5 |
| KM104061 | <i>Stereum complicatum</i> <sup>WD</sup>       | <i>Stereum complicatum</i><br>(KJ140563.1)       | 99 %  | 98 %  | 1 | 1 | 2 | 1 | 0 | 0 | 5 |
| KM104021 | <i>Peniophora incarnata</i> <sup>WD</sup>      | <i>Peniophora</i> sp.<br>(KC176330.1)            | 99 %  | 100 % | 0 | 0 | 1 | 1 | 0 | 2 | 4 |
| KM104086 | <i>Trichosporon asahii</i>                     | <i>Trichosporon asahii</i><br>(AB369919.1)       | 100 % | 99 %  | 0 | 0 | 0 | 2 | 1 | 1 | 4 |
| KM104030 | <i>Phlebia brevispora</i> <sup>WD</sup>        | <i>Phlebia brevispora</i><br>(AB084616.1)        | 99 %  | 99 %  | 0 | 0 | 0 | 3 | 0 | 0 | 3 |
| KM104033 | <i>Pisolithus tinctorius</i>                   | <i>Pisolithus tinctorius</i><br>(EU718114.1)     | 99 %  | 99 %  | 1 | 2 | 0 | 0 | 0 | 0 | 3 |
| KM104058 | <i>Skeletocutis chrysella</i> <sup>WD</sup>    | <i>Skeletocutis chrysella</i><br>(JQ673127.1)    | 99 %  | 100 % | 0 | 0 | 0 | 1 | 1 | 1 | 3 |
| KM104063 | <i>Stereum</i> sp. 4 <sup>WD</sup>             | <i>Stereum</i> sp.<br>(JX460856.1)               | 98 %  | 100 % | 2 | 0 | 0 | 0 | 1 | 0 | 3 |
| KM104120 | Tremellales sp. 12                             | <i>Cryptococcus</i> sp.<br>(EF363148.1)          | 82 %  | 96 %  | 1 | 2 | 0 | 0 | 0 | 0 | 3 |
| KM103955 | <i>Athelia arachnoidea</i> <sup>WD</sup>       | <i>Athelia arachnoidea</i><br>(GU187504.1)       | 99 %  | 100 % | 0 | 0 | 0 | 1 | 0 | 1 | 2 |
| KM103956 | Atheliaceae sp. 1 <sup>WD</sup>                | <i>Amphinema</i> sp. 7<br>(JN943925.1)           | 96 %  | 100 % | 0 | 1 | 1 | 0 | 0 | 0 | 2 |
| KM104112 | <i>Bjerkandera adusta</i> <sup>WD</sup>        | <i>Bjerkandera adusta</i><br>(KC176334.1)        | 99 %  | 100 % | 1 | 0 | 1 | 0 | 0 | 0 | 2 |
| KM103973 | <i>Cryptococcus</i> sp. 2                      | <i>Cryptococcus gattii</i><br>(JN939462.1)       | 93 %  | 100 % | 0 | 1 | 0 | 0 | 0 | 1 | 2 |
| KM103999 | <i>Heterobasidion irregulare</i> <sup>WD</sup> | <i>Heterobasidion irregulare</i><br>(KC492935.1) | 100 % | 100 % | 1 | 0 | 1 | 0 | 0 | 0 | 2 |
| KM104002 | <i>Irpex lacteus</i> <sup>WD</sup>             | <i>Irpex lacteus</i><br>(JX290578.1)             | 99 %  | 100 % | 0 | 0 | 1 | 0 | 0 | 1 | 2 |
| KM104036 | <i>Peniophora</i> sp. 4 <sup>WD</sup>          | Polyporales sp.<br>(EF672293.1)                  | 99 %  | 100 % | 0 | 0 | 0 | 1 | 1 | 0 | 2 |
| KM104032 | <i>Phlebia tremellosa</i> <sup>WD</sup>        | <i>Phlebia tremellosa</i><br>(AB811854.1)        | 99 %  | 100 % | 2 | 0 | 0 | 0 | 0 | 0 | 2 |
| KM104122 | Polyporales sp. 8 <sup>WD</sup>                | <i>Daedaleopsis confragosa</i>                   | 82 %  | 89 %  | 0 | 0 | 2 | 0 | 0 | 0 | 2 |

| (KJ140587.1) |                                           |                                                  |       |       |   |   |   |   |   |   |   |
|--------------|-------------------------------------------|--------------------------------------------------|-------|-------|---|---|---|---|---|---|---|
| KM104055     | <i>Serpula himantioides</i> <sup>WD</sup> | <i>Serpula himantioides</i><br>(GU187545.1)      | 99 %  | 100 % | 0 | 0 | 1 | 1 | 0 | 0 | 2 |
| KM104059     | <i>Skeletocutis odora</i> <sup>WD</sup>   | <i>Skeletocutis odora</i><br>(FJ903307.1)        | 100 % | 98 %  | 1 | 0 | 0 | 0 | 0 | 1 | 2 |
| KM104073     | <i>Tremella encephala</i>                 | <i>Tremella encephala</i><br>(EU673083.1)        | 99 %  | 100 % | 1 | 1 | 0 | 0 | 0 | 0 | 2 |
| KM104113     | Tremellales sp. 11                        | <i>Cryptococcus</i> sp.<br>(AY518273.1)          | 93 %  | 90 %  | 1 | 1 | 0 | 0 | 0 | 0 | 2 |
| KM104132     | Unidentified Basidiomycete 45             | <i>Cryptococcus</i> sp.<br>(GU997163.1)          | 88 %  | 48 %  | 0 | 2 | 0 | 0 | 0 | 0 | 2 |
| KM104152     | <i>Vacellum pratense</i>                  | <i>Vacellum pratense</i><br>(DQ112554.1)         | 99 %  | 95 %  | 1 | 0 | 1 | 0 | 0 | 0 | 2 |
| KM103939     | Agaricomycetes sp. 1 <sup>WD</sup>        | Polyporales sp.<br>(EF694649.1)                  | 99 %  | 97 %  | 0 | 0 | 0 | 0 | 1 | 0 | 1 |
| KM103941     | Agaricomycetes sp. 11 <sup>WD</sup>       | <i>Grifola sordulenta</i><br>(GU222266.1)        | 90 %  | 100 % | 0 | 0 | 0 | 1 | 0 | 0 | 1 |
| KM104131     | Agaricomycetes sp. 17 <sup>WD</sup>       | <i>Amyloathelia crassiuscula</i><br>(DQ144610.1) | 82 %  | 91 %  | 0 | 0 | 0 | 0 | 1 | 0 | 1 |
| KM104137     | Agaricomycetes sp. 18 <sup>WD</sup>       | Agaricomycetes sp. 20KY06<br>(JX270560.1)        | 99 %  | 100 % | 0 | 1 | 0 | 0 | 0 | 0 | 1 |
| KM103945     | Agaricomycetes sp. 3                      | <i>Entomocorticium</i> sp.<br>(DQ118417.1)       | 97 %  | 97%   | 0 | 0 | 0 | 1 | 0 | 0 | 1 |
| KM103957     | Atheliaceae sp. 2 <sup>WD</sup>           | <i>Athelia</i> sp.<br>(GU187502.1)               | 96 %  | 97 %  | 0 | 0 | 0 | 1 | 0 | 0 | 1 |
| KM103947     | Atheliales sp. 3 <sup>WD</sup>            | <i>Amphinema</i> sp. 5<br>(JN943909.1)           | 86 %  | 97 %  | 0 | 1 | 0 | 0 | 0 | 0 | 1 |
| KM103943     | Boletales sp. 1                           | <i>Boletus pulcherrimus</i><br>(EU669376.1)      | 88 %  | 84 %  | 1 | 0 | 0 | 0 | 0 | 0 | 1 |
| KM103960     | <i>Calvatia</i> sp. 1                     | <i>Calvatia fragilis</i><br>(AJ617493.1)         | 99 %  | 100 % | 0 | 0 | 0 | 0 | 0 | 1 | 1 |
| KM103966     | <i>Collybia subnuda</i> <sup>WD</sup>     | <i>Collybia subnuda</i><br>(U43780.1)            | 99 %  | 100 % | 0 | 0 | 0 | 0 | 0 | 1 | 1 |
| KM103968     | <i>Coprinellus</i> sp. 1 <sup>WD</sup>    | <i>Coprinellus radians</i><br>(AY461815.1)       | 99 %  | 100 % | 0 | 0 | 0 | 1 | 0 | 0 | 1 |
| KM104035     | <i>Crustoderma</i> sp. 1 <sup>WD</sup>    | <i>Crustoderma corneum</i><br>(KC585319.1)       | 93 %  | 100 % | 0 | 0 | 0 | 0 | 1 | 0 | 1 |

|          |                                            |                                                       |       |       |   |   |   |   |   |   |   |
|----------|--------------------------------------------|-------------------------------------------------------|-------|-------|---|---|---|---|---|---|---|
| KM103988 | Cryptobasidiaceae<br>sp. 1                 | <i>Clinoconidium</i> sp.<br>(AB245088.1)              | 93 %  | 92 %  | 0 | 0 | 1 | 0 | 0 | 0 | 1 |
| KM103974 | <i>Cryptococcus</i> sp. 5                  | <i>Cryptococcus</i> sp.<br>(HQ890370.1)               | 99 %  | 100 % | 0 | 0 | 1 | 0 | 0 | 0 | 1 |
| KM103942 | Entolomataceae sp.<br>1                    | <i>Entoloma</i> sp.<br>(JX029939.1)                   | 96 %  | 100 % | 1 | 0 | 0 | 0 | 0 | 0 | 1 |
| KM103986 | <i>Exidia glandulosa</i> <sup>WD</sup>     | <i>Exidia glandulosa</i><br>(AY509555.1)              | 98 %  | 100 % | 0 | 1 | 0 | 0 | 0 | 0 | 1 |
| KM103989 | <i>Fibroporia radiculosa</i> <sup>WD</sup> | <i>Fibroporia radiculosa</i><br>(KC585339.1)          | 100 % | 100 % | 0 | 0 | 1 | 0 | 0 | 0 | 1 |
| KM103990 | <i>Fibulorhizoctonia</i><br>sp. 1          | <i>Fibulorhizoctonia</i> sp.<br>(AY854062.1)          | 92 %  | 100 % | 1 | 0 | 0 | 0 | 0 | 0 | 1 |
| KM103994 | <i>Ganoderma</i> sp. 1 <sup>WD</sup>       | <i>Ganoderma meredithae</i><br>(JQ520191.1)           | 99 %  | 96 %  | 0 | 1 | 0 | 0 | 0 | 0 | 1 |
| KM103996 | <i>Gymnopilus</i> sp. 1 <sup>WD</sup>      | <i>Gymnopilus</i> sp.<br>(AY281019.1)                 | 95 %  | 100 % | 1 | 0 | 0 | 0 | 0 | 0 | 1 |
| KM103997 | <i>Gymnopus spongiosus</i> <sup>WD</sup>   | <i>Gymnopus spongiosus</i><br>(AF505784.1)            | 99 %  | 96 %  | 0 | 1 | 0 | 0 | 0 | 0 | 1 |
| KM104000 | <i>Hyphoderma setigerum</i> <sup>WD</sup>  | <i>Hyphoderma setigerum</i><br>(KJ140750.1)           | 99 %  | 100 % | 0 | 0 | 1 | 0 | 0 | 0 | 1 |
| KM103969 | <i>Hyphodontia</i> sp.<br>1 <sup>WD</sup>  | <i>Hyphodontia</i> sp.<br>(DQ340319.1)                | 99 %  | 95 %  | 0 | 0 | 0 | 1 | 0 | 0 | 1 |
| KM103970 | <i>Hypochnicium</i> sp.<br>1 <sup>WD</sup> | <i>Hypochnicium punctulatum</i><br>(AF429412.1)       | 92 %  | 90 %  | 0 | 0 | 0 | 1 | 0 | 0 | 1 |
| KM104008 | <i>Mycena clavicularis</i> <sup>WD</sup>   | <i>Mycena clavicularis</i><br>(JF908466.1)            | 99 %  | 100 % | 0 | 0 | 1 | 0 | 0 | 0 | 1 |
| KM103963 | <i>Mycocacia fuscoatra</i> <sup>WD</sup>   | <i>Mycocacia fuscoatra</i><br>(KJ140744.1)            | 99 %  | 99 %  | 0 | 0 | 0 | 0 | 0 | 1 | 1 |
| KM104009 | <i>Neolentinus lepideus</i> <sup>WD</sup>  | <i>Neolentinus lepideus</i><br>(AB615456.1)           | 98 %  | 98 %  | 1 | 0 | 0 | 0 | 0 | 0 | 1 |
| KM104010 | Outerspace Basidio<br>1                    | <i>Exobasidium symploci-japonicae</i><br>(AB180351.1) | 95 %  | 31 %  | 0 | 0 | 0 | 1 | 0 | 0 | 1 |
| KM104011 | Outerspace Basidio<br>2                    | <i>Tremella polyporina</i><br>(JN053501.1)            | 88 %  | 56 %  | 0 | 0 | 1 | 0 | 0 | 0 | 1 |
| KM104012 | <i>Oxyporus</i>                            | <i>Oxyporus populinus</i>                             | 99 %  | 99 %  | 1 | 0 | 0 | 0 | 0 | 0 | 1 |

|          |                                             |                                                           |       |       |   |   |   |   |   |   |   |
|----------|---------------------------------------------|-----------------------------------------------------------|-------|-------|---|---|---|---|---|---|---|
|          | <i>populinus</i> <sup>WD</sup>              | (KJ140633.1)                                              |       |       |   |   |   |   |   |   |   |
| KM104022 | <i>Peniophora</i> sp. 1 <sup>WD</sup>       | <i>Peniophora pini</i><br>(EU118651.1)                    | 97 %  | 100 % | 0 | 1 | 0 | 0 | 0 | 0 | 1 |
| KM104047 | <i>Peniophora</i> sp. 5 <sup>WD</sup>       | <i>Peniophora</i> sp.<br>(JN198493.1)                     | 98 %  | 95 %  | 0 | 0 | 0 | 1 | 0 | 0 | 1 |
| KM104031 | <i>Phlebia radiata</i> <sup>WD</sup>        | <i>Phlebia radiata</i><br>(KF156332.1)                    | 99 %  | 100 % | 0 | 1 | 0 | 0 | 0 | 0 | 1 |
| KM104037 | <i>Phlebiella</i> sp. 1 <sup>WD</sup>       | <i>Phlebiella<br/>christiansenii</i><br>(EU118659.1)      | 92 %  | 98 %  | 0 | 1 | 0 | 0 | 0 | 0 | 1 |
| KM104129 | Polyporales sp. 9 <sup>WD</sup>             | <i>Trametes versicolor</i><br>(JN164975.1)                | 85 %  | 83 %  | 0 | 0 | 0 | 1 | 0 | 0 | 1 |
| KM104039 | <i>Polyporus squamosus</i> <sup>WD</sup>    | <i>Polyporus squamosus</i><br>(AF516589.1)                | 100 % | 100 % | 0 | 0 | 0 | 0 | 0 | 1 | 1 |
| KM104054 | <i>Schizophyllum commune</i> <sup>WD</sup>  | <i>Schizophyllum<br/>commune</i><br>(JN882337.1)          | 99 %  | 99 %  | 0 | 0 | 0 | 0 | 0 | 1 | 1 |
| KM104083 | <i>Schizopora</i> sp. 1 <sup>WD</sup>       | <i>Schizopora</i> sp.<br>(JQ673190.1)                     | 99 %  | 100 % | 0 | 0 | 0 | 0 | 0 | 1 | 1 |
| KM104144 | Septobasidiaceae sp. 1                      | <i>Septobasidium<br/>ramorum</i><br>(DQ241450.1)          | 87 %  | 83 %  | 0 | 0 | 1 | 0 | 0 | 0 | 1 |
| KM104056 | <i>Sistotrema brinkmannii</i> <sup>WD</sup> | <i>Sistotrema<br/>brinkmannii</i><br>(DQ899094.1)         | 99 %  | 100 % | 1 | 0 | 0 | 0 | 0 | 0 | 1 |
| KM104139 | <i>Sistotremastrum</i> sp. 2 <sup>WD</sup>  | <i>Sistotremastrum</i> sp.<br>(KJ140723.1)                | 92 %  | 98 %  | 0 | 0 | 0 | 0 | 1 | 0 | 1 |
| KM104057 | <i>Skeletocutis</i> sp. 10 <sup>WD</sup>    | <i>Skeletocutis diluta</i><br>(JF692198.1)                | 99 %  | 95 %  | 0 | 0 | 1 | 0 | 0 | 0 | 1 |
| KM103948 | Stereaceae sp. 1 <sup>WD</sup>              | <i>Acanthophysium<br/>lividocaeruleum</i><br>(AY618666.1) | 94 %  | 96 %  | 0 | 0 | 0 | 1 | 0 | 0 | 1 |
| KM104060 | <i>Stereum sanguinolentum</i> <sup>WD</sup> | <i>Stereum<br/>sanguinolentum</i><br>(KF996533.1)         | 98 %  | 100 % | 0 | 1 | 0 | 0 | 0 | 0 | 1 |
| KM103944 | Strophariaceae sp. 1                        | <i>Psilocybe</i> sp.<br>(AB968235.1)                      | 92 %  | 100 % | 0 | 1 | 0 | 0 | 0 | 0 | 1 |
| KM104066 | <i>Thelephora terrestris</i>                | <i>Thelephora terrestris</i><br>(JQ711777.1)              | 98 %  | 100 % | 0 | 0 | 1 | 0 | 0 | 0 | 1 |

|          |                                             |                                                 |       |       |   |   |   |   |   |   |   |
|----------|---------------------------------------------|-------------------------------------------------|-------|-------|---|---|---|---|---|---|---|
| KM104069 | <i>Trametes conchifer</i> <sup>WD</sup>     | <i>Trametes conchifer</i><br>(JN164988.1)       | 99 %  | 100 % | 0 | 1 | 0 | 0 | 0 | 0 | 1 |
| KM104070 | <i>Trametes cubensis</i> <sup>WD</sup>      | <i>Trametes cubensis</i><br>(JN164922.1)        | 100 % | 100 % | 0 | 0 | 1 | 0 | 0 | 0 | 1 |
| KM104072 | <i>Trechispora</i> sp. 1                    | <i>Trechispora alnicola</i><br>(DQ411529.1)     | 92 %  | 99 %  | 0 | 0 | 0 | 1 | 0 | 0 | 1 |
| KM104074 | <i>Tremella</i> sp. 1                       | <i>Tremella phaeophysciae</i><br>(JN053479.1)   | 93 %  | 98 %  | 0 | 0 | 1 | 0 | 0 | 0 | 1 |
| KM104075 | Tremellales sp. 1                           | <i>Cryptococcus bromeliarum</i><br>(EU386359.1) | 99 %  | 85 %  | 0 | 1 | 0 | 0 | 0 | 0 | 1 |
| KM104076 | Tremellales sp. 10                          | <i>Cryptococcus</i> sp.<br>(EF363146.1)         | 88 %  | 96 %  | 0 | 0 | 1 | 0 | 0 | 0 | 1 |
| KM104078 | Tremellales sp. 6                           | <i>Hannaella</i> sp.<br>(JQ753983.1)            | 99 %  | 94 %  | 0 | 0 | 0 | 1 | 0 | 0 | 1 |
| KM104079 | Tremellales sp. 7                           | <i>Bullera psuedoalba</i><br>(NR_073231.1)      | 100 % | 98 %  | 0 | 0 | 0 | 1 | 0 | 0 | 1 |
| KM104080 | Tremellales sp. 8                           | <i>Tremella foliacea</i><br>(AF444431.1)        | 94 %  | 98 %  | 0 | 0 | 0 | 1 | 0 | 0 | 1 |
| KM104082 | <i>Trichaptum abietinum</i> <sup>WD</sup>   | <i>Trichaptum abietinum</i><br>(U63475.1)       | 98 %  | 100 % | 0 | 0 | 0 | 0 | 1 | 0 | 1 |
| KM104081 | <i>Trichaptum birforme</i> <sup>WD</sup>    | <i>Trichaptum birforme</i><br>(U63473.1)        | 99 %  | 100 % | 0 | 0 | 0 | 0 | 0 | 1 | 1 |
| KM104142 | <i>Typhula</i> sp. 1                        | <i>Typhula</i> sp.<br>(AF193390.1)              | 99 %  | 98 %  | 0 | 0 | 1 | 0 | 0 | 0 | 1 |
| KM104116 | Unidentified Basidiomycete 15 <sup>WD</sup> | <i>Brevicellicium exile</i><br>(HE963779.1)     | 91 %  | 41 %  | 1 | 0 | 0 | 0 | 0 | 0 | 1 |
| KM104117 | Unidentified Basidiomycete 17 <sup>WD</sup> | <i>Athelia bombacina</i><br>(U85795.1)          | 87 %  | 98 %  | 0 | 0 | 0 | 0 | 1 | 0 | 1 |
| KM104119 | Unidentified Basidiomycete 19               | <i>Meira geulakonigii</i><br>(NR_073343.1)      | 93 %  | 42 %  | 0 | 0 | 0 | 1 | 0 | 0 | 1 |
| KM104127 | Unidentified Basidiomycete 33               | <i>Acaromyces ingoldii</i><br>(NR_073342.1)     | 94 %  | 75 %  | 0 | 0 | 0 | 1 | 0 | 0 | 1 |
| KM104133 | Unidentified Basidiomycete 46 <sup>WD</sup> | <i>Sidera vulgaris</i><br>(FN907918.1)          | 87 %  | 46 %  | 0 | 0 | 0 | 0 | 0 | 1 | 1 |
| KM104134 | Unidentified Basidiomycete 48 <sup>WD</sup> | <i>Stereum</i> sp.<br>(EU009970.1)              | 98 %  | 66 %  | 1 | 0 | 0 | 0 | 0 | 0 | 1 |
| KM104135 | Unidentified                                | <i>Botryobasidium</i>                           | 90 %  | 54 %  | 0 | 0 | 0 | 1 | 0 | 0 | 1 |

|          |                                                        |                                                          |      |       |   |   |   |   |   |   |   |
|----------|--------------------------------------------------------|----------------------------------------------------------|------|-------|---|---|---|---|---|---|---|
|          | Basidiomycete 49 <sup>WD</sup>                         | <i>botryosum</i><br>(DQ267124.1)                         |      |       |   |   |   |   |   |   |   |
| KM104140 | Unidentified<br>Basidiomycete 57                       | Tremellales sp.<br>(EF060778.1)                          | 91 % | 50 %  | 0 | 0 | 1 | 0 | 0 | 0 | 1 |
| KM104141 | Unidentified<br>Basidiomycete 58 <sup>WD</sup>         | <i>Coniophora</i><br><i>prasinoides</i><br>(GU187519.1)  | 90 % | 69 %  | 0 | 0 | 1 | 0 | 0 | 0 | 1 |
| KM104147 | Unidentified<br>Basidiomycete 63 <sup>WD</sup>         | <i>Dendrophora</i><br><i>albobadia</i><br>(AF119522.1)   | 99 % | 91 %  | 0 | 1 | 0 | 0 | 0 | 0 | 1 |
| KM104145 | Unidentified<br>Basidiomycete 9 <sup>WD</sup>          | <i>Dichostereum</i><br><i>granulosum</i><br>(KJ010078.1) | 92 % | 95 %  | 1 | 0 | 0 | 0 | 0 | 0 | 1 |
| KM104154 | <i>Xeromphalina</i><br><i>campanella</i> <sup>WD</sup> | <i>Xeromphalina</i><br><i>campanella</i><br>(HQ604741.1) | 98 % | 100 % | 0 | 0 | 0 | 1 | 0 | 0 | 1 |
